# Supplementary material for: Failure of Passive Immune Transfer in Calves: A Meta-Analysis on the Consequences and Assessment of the Economic Impact
Source: PubMed Central journal article supplement (PMC4795751; doi:10.1371/journal.pone.0150452), 2016-03-17
Supplement: pone.0150452.s002.pdf [file pone.0150452.s002.pdf]

Table S1. Definitions of costs of diseases

|                                            | $C_i$ (unit cost, €) |          |      | BRD  | Ponderation coefficient |            |             |
|--------------------------------------------|----------------------|----------|------|------|-------------------------|------------|-------------|
|                                            | Low                  | Moderate | High |      | Diarrhoea               | Omphalitis | Septicaemia |
| Antibiotic (parenteral route)              | 5                    | 8.5      | 11   | 1    | 0.5                     | 1          | 1           |
| Antibiotic (local route)                   | 0.5                  | 1        | 2    | 0    | 1                       | 0          | 0           |
| No-steroid anti-inflammatory               | 5                    | 8.8      | 14   | 1    | 0.5                     | 0          | 1           |
| Steroid anti-inflammatory                  |                      | 1.24     |      | 0.25 | 0                       | 0          | 1           |
| Solute for rehydration (oral route)        | 1.5                  | 4.13     | 6.5  | 0    | 0.9                     | 0          | 0           |
| Solute for rehydration (intravenous route) | 8                    | 9.3      | 14   | 0    | 0.45                    | 0          | 1           |
| Veterinarian visit to farm                 | 30                   | 40       | 60   | 0    | 0.33                    | 0          | 1           |
| Omphalitis surgery                         | 100                  | 150      | 200  | 0    | 0                       | 0.1        | 0           |
| Cost of labour (15 min)                    |                      | 15.6     |      | 0.25 | 0.25                    | 0          | 0           |
