# Supplementary material for: Failure of Passive Immune Transfer in Calves: A Meta-Analysis on the Consequences and Assessment of the Economic Impact
Source: PubMed Central journal article supplement (PMC4795751; doi:10.1371/journal.pone.0150452), 2016-03-17
Supplement: pone.0150452.s003.pdf [file pone.0150452.s003.pdf]

Table S2. Raw data used for the meta-analysis and to calculate the prevalence of mortality in calves without failure of passive transfer

| # of calves | Definition of FPT <sup>1</sup> |            | Risk (95% CI) for mortality in the case of FPT <sup>1</sup> |        |                   |                 |       |             | Covariates       |                    | References |
|-------------|--------------------------------|------------|-------------------------------------------------------------|--------|-------------------|-----------------|-------|-------------|------------------|--------------------|------------|
|             | Control (g/l)                  | FPT (g/l)  | Prev <sup>3</sup>                                           | Period | Prev <sup>3</sup> | Risk            | Value | CI95%       | U/M <sup>4</sup> | Breed <sup>5</sup> |            |
| 2,278       | TP ≥ 55                        | TP = 45-55 | 39                                                          | 0-112  | 5.6               | RR              | 1.32  | 0.944-1.85  | U                | D                  | [1]        |
| 2,149       | TP ≥ 55                        | TP = 45-50 | 36                                                          | 0-112  | 7.2               | RR              | 2.21  | 1.63-3      | U                | D                  | [1]        |
| 1,740       | TP ≥ 55                        | TP = 40-45 | 21                                                          | 0-112  | 7.2               | RR              | 3.1   | 2.23-4.32   | U                | D                  | [1]        |
| 1,434       | TP ≥ 55                        | TP < 40    | 4                                                           | 0-112  | 5.8               | RR              | 4.64  | 2.77-7.77   | U                | D                  | [1]        |
| 3,479       | TP ≥ 55                        | TP < 55    | 60                                                          | 0-112  | 8.2               | RR              | 2.05  | 1.58-2.67   | U                | D                  | [1]        |
| 1,000       | IgG ≥ 12                       | IgG < 12   | 28                                                          | 0-180  | 4.3               | RR              | 2.04  | 1.14-3.66   | U                | D                  | [2]        |
| 1,000       | IgG ≥ 18                       | IgG < 18   | 43                                                          | 0-180  | 4.3               | RR              | 2.17  | 1.18-3.97   | U                | D                  | [2]        |
| 246         | IgG ≥ 5                        | IgG < 5    | 13                                                          | 0-100  | 6.1               | RR              | 2.52  | 0.86-7.43   | U                | D                  | [3]        |
| 246         | IgG ≥ 10                       | IgG < 10   | 35                                                          | 0-100  | 6.1               | RR              | 1.24  | 0.46-3.37   | U                | D                  | [3]        |
| 246         | IgG ≥ 15                       | IgG < 15   | na                                                          | 0-100  | 6.1               | RR              | 0.88  | 0.32-2.39   | U                | D                  | [3]        |
| 246         | TP ≥ 45                        | TP < 45    | na                                                          | 0-100  | 6.1               | RR              | 2.55  | 0.64-10.1   | U                | D                  | [3]        |
| 246         | TP ≥ 50                        | TP < 50    | 27                                                          | 0-100  | 6.1               | RR              | 1.7   | 0.60-4.8    | U                | D                  | [3]        |
| 246         | TP ≥ 55                        | TP < 55    | 48                                                          | 0-100  | 6.1               | RR              | 1.24  | 0.46-3.31   | U                | D                  | [3]        |
| 3,103       | TP ≥ 54                        | TP < 54    | na                                                          | 0-30   | na                | RR              | 1.4   | 0.847-2.31  | U                | D                  | [4]        |
| 3,103       | TP ≥ 54                        | TP < 54    | na                                                          | 0-180  | 11.7              | RR              | 1.58  | 1.22-2.04   | U                | D                  | [4]        |
| na          | TP ≥ 54                        | TP < 50    | na                                                          | 0-180  | 11.7              | RR              | 1.89  | 0.89-4.1    | U                | D                  | [4]        |
| na          | TP ≥ 54                        | TP = 50-54 | na                                                          | 0-180  | 11.7              | RR              | 1.28  | 0.56-2.93   | U                | D                  | [4]        |
| 601         | IgG ≥ 24                       | IgG < 24   | 33                                                          | 0-90   | na                | OR              | 2.56  | 1.21-5.29   | U                | B                  | [5]        |
| 263         | IgG ≥ 16                       | IgG < 8    | 33                                                          | 0-163  | 3.0               | OR              | 5.4   | 1.3-23.5    | U                | B                  | [6]        |
| 1,424       | IgG ≥ 16                       | IgG < 8    | 14                                                          | 0-200  | 2.7               | OR              | 4.9   | 2.5-9.5     | M <sup>7</sup>   | B                  | [7]        |
| 1,338       | IgG ≥ 16                       | IgG = 8-16 | 17                                                          | 0-200  | 2.7               | OR              | 1.2   | 0.3-4.1     | M <sup>7</sup>   | B                  | [7]        |
| 1,556       | IgG ≥ 16                       | IgG < 16   | 23                                                          | 0-200  | 2,7               | OR              | 3,4   | 1,8-6,5     | M <sup>7</sup>   | B                  | [7]        |
| 1,556       | IgG ≥ 24                       | IgG < 24   | 41                                                          | 0-200  | 2,7               | OR              | 2,7   | 1,34-5,36   | M <sup>7</sup>   | B                  | [7]        |
| 147         | IgG ≥ 10                       | IgG < 10   | 44                                                          | 0-56   | 16,3              | OR              | 1,33  | 1,04-1,71   | U                | D                  | [8]        |
| 156         | IgG ≥ 10                       | IgG < 10   | 19,05                                                       | 0-28   | 40,38             | HR <sup>6</sup> | 26,2  | 7,6-90,38   | M                | D                  | [9]        |
| 156         | IgG ≥ 10                       | IgG < 3.5  | 19                                                          | 0-28   | 40,4              | OR              | 35,5  | 7,92-160,77 | U                | D                  | [9]        |
| 221         | IgG ≥ 10                       | IgG < 10   | 42,86                                                       | 0-28   | 12,82             | HR <sup>6</sup> | 5,88  | 1,68-20,52  | M                | D                  | [9]        |

|       |               |              |    |      |      |    |      |            |   |   |      |
|-------|---------------|--------------|----|------|------|----|------|------------|---|---|------|
| 221   | IgG $\geq$ 10 | IgG = 3.5-10 | 43 | 0-28 | 12,8 | OR | 7,5  | 1,67-33,78 | U | D | [9]  |
| 273   | IgG $\geq$ 10 | IgG < 10     | 62 | 0-28 | 21   | OR | 13,8 | 3,25-58,56 | U | D | [9]  |
| 2,177 | IgG $\geq$ 10 | IgG < 10     | 41 | 0-56 | 5,7  | RR | 2,12 | 1,06-4,28  | U | D | [10] |

Na: not available. 1: Failure of passive transfer; 2: these animals are used as reference (no FPT) to calculate the OR. When not specified, they are the opposite of the definition of FPT; 3: Prevalence; 4: U=univariate model; M=multivariate model; 5: D=dairy; B=Beef; C: Crossed or undetermined. 6: HR were not included in the meta-regression. 7: Co-variables were dameline, sireline, and year.

## References

1. Tyler JW, Hancock DD, Thorne JG, Gay CC, Gay JM. Partitioning the mortality risk associated with inadequate passive transfer of colostral immunoglobulins in dairy calves. *J Vet Intern Med.* 1999;13: 335-337.
2. Robison JD, Stott GH, DeNise SK. Effects of passive immunity on growth and survival in the dairy heifer. *J Dairy Sci.* 1988;71: 1283-1287.
3. Rea DE, Tyler JW, Hancock DD, Besser TE, Wilson L, Krytenberg DS, et al. Prediction of calf mortality by use of tests for passive transfer of colostral immunoglobulin. *J Am Vet Med Assoc.* 1996;208: 2047-2049.
4. Donovan GA, Dohoo IR, Montgomery DM, Bennett FL. Associations between passive immunity and morbidity and mortality in dairy heifers in Florida, USA. *Prev Vet Med.* 1998;34: 31-46.
5. Waldner CL, Rosengren LB. Factors associated with serum immunoglobulin levels in beef calves from Alberta and Saskatchewan and association between passive transfer and health outcomes. *Can Vet J.* 2009;50: 275-281.
6. Wittum TE, Perino LJ. Passive immune status at postpartum hour 24 and long-term health and performance of calves. *Am J Vet Res.* 1995;56: 1149-1154.
7. Dewell RD, Hungerford LL, Keen JE, Laegreid WW, Griffin DD, Rupp GP, et al. Association of neonatal serum immunoglobulin G1 concentration with health and performance in beef calves. *J Am Vet Med Assoc.* 2006;228: 914-921.
8. Priestley D, Bittar JH, Ibarbia L, Risco CA, Galvao KN. Effect of feeding maternal colostrum or plasma-derived or colostrum-derived colostrum replacer on passive transfer of immunity, health, and performance of preweaning heifer calves. *J Dairy Sci.* 2013;96: 3247-3256.
9. Berge AC, Besser TE, Moore DA, Sischo WM. Evaluation of the effects of oral colostrum supplementation during the first fourteen days on the health and performance of preweaned calves. *J Dairy Sci.* 2009;92: 286-295.
10. National Animal Health Monitoring System. Transfer of maternal immunity to calves. Washington, DC: National Dairy Heifer Evaluation Project (NDHEP), USDA; 1993.
11. Furman-Fratczak K, Rzasa A, Stefaniak T. The influence of colostral immunoglobulin concentration in heifer calves' serum on their health and growth. *J Dairy Sci.* 2011;94: 5536-5543.
12. Van Donkersgoed J, Ribble CS, Boyer LG, Townsend HG. Epidemiological study of enzootic pneumonia in dairy calves in Saskatchewan. *Can J Vet Res.* 1993;57: 247-254.

13. Virtala AM, Grohn YT, Mechor GD, Erb HN. The effect of maternally derived immunoglobulin G on the risk of respiratory disease in heifers during the first 3 months of life. *Prev Vet Med.* 1999;39: 25-37.
14. Windeyer MC, Leslie KE, Godden SM, Hodgins DC, Lissemore KD, LeBlanc SJ. Factors associated with morbidity, mortality, and growth of dairy heifer calves up to 3 months of age. *Prev Vet Med.* 2014;113: 231-240.
15. Virtala AM, Mechor GD, Grohn YT, Erb HN. Morbidity from nonrespiratory diseases and mortality in dairy heifers during the first three months of life. *J Am Vet Med Assoc.* 1996;208: 2043-2046.
16. Gow S, Waldner C, Ross C. The effect of treatment duration on weaning weights in a cow-calf herd with a protracted severe outbreak of diarrhea in calves. *Can Vet J.* 2005;46: 418-423, 425-416.
