# Supplementary material for: Failure of Passive Immune Transfer in Calves: A Meta-Analysis on the Consequences and Assessment of the Economic Impact
Source: PubMed Central journal article supplement (PMC4795751; doi:10.1371/journal.pone.0150452), 2016-03-17
Supplement: pone.0150452.s004.pdf [file pone.0150452.s004.pdf]

Table S3. Raw data used for the meta-analysis and to calculate the prevalence of diseases in calves without failure of passive transfer

| # of calves | Definition of FPT <sup>1</sup> |              | Prev <sup>3</sup> | Risk (95% CI) for diseases in the case of FPT <sup>1</sup> |        |                   |      |       |                         | Covariates       |                    | References |
|-------------|--------------------------------|--------------|-------------------|------------------------------------------------------------|--------|-------------------|------|-------|-------------------------|------------------|--------------------|------------|
|             | Control (g/l)                  | FPT (g/l)    |                   | Disease                                                    | Period | Prev <sup>3</sup> | Risk | Value | 95%CI                   | U/M <sup>4</sup> | Breed <sup>5</sup> |            |
| 175         | IgG ≥ 5                        | IgG < 5      | 60                | BRD, FD <sup>6</sup>                                       | 0-15   | 14                | RR   | 1,44  | 0,94-2,19               | U                | D                  | [11]       |
| 175         | IgG ≥ 10                       | IgG < 10     | 60                | BRD, FD <sup>6</sup>                                       | 0-15   | 14                | OR   | 5,79  | 4,35-7,69               | U                | D                  | [11]       |
| 325         | IgG ≥ 8                        | IgG < 8      | 27                | BRD, FD <sup>6</sup>                                       | 0-120  | 39                | OR   | 1,205 | 0,69-2,53               | U                | D                  | [12]       |
| 325         | IgG ≥ 8                        | IgG < 8      | 27                | BRD, FD <sup>6</sup>                                       | 0-120  | 27                | OR   | 2,44  | 1,38-4,3                | U                | D                  | [12]       |
| 375         | IgG ≥ 12                       | IgG < 12     | na                | BRD, CD <sup>6</sup>                                       | 0-90   | na                | OR   | 1,9   | 1,1-3,2                 | M <sup>12</sup>  | D                  | [13]       |
| 161         | IgG ≥ 12                       | IgG < 12     | na                | BRD, CD <sup>6</sup>                                       | 0-90   | na                | OR   | 2,3   | 1,1-4,9                 | U                | D                  | [13]       |
| 161         | IgG ≥ 10                       | IgG < 10     | na                | BRD, CD <sup>6</sup>                                       | 0-90   | na                | OR   | 2,1   | 1,0-4,4                 | U                | D                  | [13]       |
| 161         | IgG ≥ 8                        | IgG < 8      | na                | BRD, CD <sup>6</sup>                                       | 0-90   | na                | OR   | 2,2   | 1,0-4,8                 | U                | D                  | [13]       |
| 3300        | TP ≥ 50                        | TP < 50      | na                | BRD, FD <sup>6,9</sup>                                     | 0-180  | 21                | OR   | 1,27  |                         | U                | D                  | [4]        |
| 3300        | TP ≥ 50                        | TP < 50      | na                | BRD, FD <sup>6,10</sup>                                    | 0-180  | 21                | OR   | 2,54  |                         | U                | D                  | [4]        |
| 2874        | TP ≥ 57                        | TP < 57      | 11                | BRD, FD <sup>6</sup>                                       | 0-90   | 22                | OR   | 1,6   | 1,3-2,0                 | M <sup>13</sup>  | D                  | [14]       |
| 263         | IgG ≥ 16                       | IgG < 16     | 31                | BRD, FD <sup>6</sup>                                       | 0-162  | 47                | RR   | 1,72  | 0,39-7,5                | U                | C                  | [6]        |
| 263         | IgG ≥ 8                        | IgG < 8      | 25                | BRD, FD <sup>6</sup>                                       | 0-162  | 47                | RR   | 2,54  | 0,58-11,02              | U                | C                  | [6]        |
| 263         | TP ≥ 48                        | TP < 48      | 19                | BRD, FD <sup>6</sup>                                       | 0-162  | 47                | RR   | 3,1   | 1,5-6,5                 | M <sup>14</sup>  | C                  | [6]        |
| 175         | IgG ≥ 5                        | IgG < 5      | 60                | Dia <sup>7</sup>                                           | 0-160  | 36                | RR   | 1,27  | 0,469-1,74              | U                | C                  | [11]       |
| 175         | IgG ≥ 10                       | IgG < 10     | 60                | Dia <sup>7</sup>                                           | 0-160  | 36                | RR   | 1,32  | 0,978-1,78              | U                |                    | [11]       |
| 175         | IgG ≥ 15                       | IgG < 15     | 60                | Dia <sup>7</sup>                                           | 0-160  | 36                | RR   | 1,22  | 0,84-1,76               | U                |                    | [11]       |
| 156         | IgG ≥ 10                       | IgG ≤ 3.5    | 19                | Dia-days, SD <sup>7,11</sup>                               | 0-28   | 9                 | RR   | 2,88  | 2,22-3,71 <sup>18</sup> | M                |                    | [9]        |
| 221         | IgG ≥ 10                       | IgG = 3.5-10 | 62                | Dia-days, SD <sup>7</sup> : SD <sup>7,11</sup>             | 0-28   | 9                 | RR   | 1,85  | 1,5-2,8 <sup>18</sup>   | M                |                    | [9]        |
| 263         | IgG ≥ 16                       | IgG ≤ 8      | 22                | all diseases                                               | 0-28   | 10                | OR   | 6,4   | 0,4-10,7                | M <sup>15</sup>  | C                  | [6]        |
| 263         | IgG ≥ 16                       | IgG = 8-16   | 11                | all diseases                                               | 0-28   | 10                | OR   | 2,1   | 2,6-15,7                | M <sup>15</sup>  | C                  | [6]        |
| 263         | IgG ≥ 16                       | IgG ≤ 8      | 22                | all diseases                                               | 0-163  | 20                | OR   | 3,2   | 1,6-6,4                 | M <sup>15</sup>  | C                  | [6]        |
| 263         | IgG ≥ 16                       | IgG = 8-16   | 11                | all diseases                                               | 0-163  | 20                | OR   | 3,6   | 1,3-10                  | M <sup>15</sup>  | C                  | [6]        |
| 1556        | IgG ≥ 16                       | IgG ≤ 8      | 14                | all diseases                                               | 0-200  | 12                | RR   | 2,24  | 1,52-3,29               | M <sup>16</sup>  | D                  | [7]        |
| 1556        | IgG ≥ 16                       | IgG = 8-16   | 55                | all diseases                                               | 0-200  | 12                | RR   | 1,38  | 0,80-2,39               | M <sup>16</sup>  | D                  | [7]        |
| 601         | IgG ≥ 16                       | IgG ≤ 16     | 16                | BRD, Dia, Omp <sup>8</sup>                                 | 0-90   | 18                | OR   | 1,51  | 1,06-2,16               | M <sup>17</sup>  | D                  | [5]        |
| 147         | IgG ≥ 10                       | IgG ≤ 10     | 55                | BRD, Dia                                                   | 0-56   | 61                | RR   | 1,33  | 1,035-1,708             | U                | B                  | [8]        |

Na: not available. 1: Failure of passive transfer; 2: these animals are used as reference (no FPT) to calculate the OR. When not specified, they are the opposite of the definition of FPT; 3: Prevalence; 4 U=univariate model; M=multivariate model; 5: D=dairy; B=Beef; C: Crossed or undetermined. 6: Bovine respiratory diseases, diagnosed by farmer (FD), clinician (CD) or study personnel (SD). 7: Diarrhoea, or diarrhoea-days, diagnosed by study personnel (SD). 8: Omphalitis. 9: Winter, 2 days of treatment; 10: Summer, 2 days of treatment; 11: Definition of diarrhoea: watery and/or bloody faeces; 12: Covariates were Saison, Housing with adults and mastitis on cow; 13: Covariates were Saison, vaccine, previous disease and navel disinfection; 14: Covariate was sex; 15: Covariate was twin; 16: Covariates were year, pre-weaning, dameline, sireline and year; 17: Covariate was selenium status; 18: 90% CI.

## References

1. Tyler JW, Hancock DD, Thorne JG, Gay CC, Gay JM. Partitioning the mortality risk associated with inadequate passive transfer of colostral immunoglobulins in dairy calves. *J Vet Intern Med.* 1999;13: 335-337.
2. Robison JD, Stott GH, DeNise SK. Effects of passive immunity on growth and survival in the dairy heifer. *J Dairy Sci.* 1988;71: 1283-1287.
3. Rea DE, Tyler JW, Hancock DD, Besser TE, Wilson L, Krytenberg DS, et al. Prediction of calf mortality by use of tests for passive transfer of colostral immunoglobulin. *J Am Vet Med Assoc.* 1996;208: 2047-2049.
4. Donovan GA, Dohoo IR, Montgomery DM, Bennett FL. Associations between passive immunity and morbidity and mortality in dairy heifers in Florida, USA. *Prev Vet Med.* 1998;34: 31-46.
5. Waldner CL, Rosengren LB. Factors associated with serum immunoglobulin levels in beef calves from Alberta and Saskatchewan and association between passive transfer and health outcomes. *Can Vet J.* 2009;50: 275-281.
6. Wittum TE, Perino LJ. Passive immune status at postpartum hour 24 and long-term health and performance of calves. *Am J Vet Res.* 1995;56: 1149-1154.
7. Dewell RD, Hungerford LL, Keen JE, Laegreid WW, Griffin DD, Rupp GP, et al. Association of neonatal serum immunoglobulin G1 concentration with health and performance in beef calves. *J Am Vet Med Assoc.* 2006;228: 914-921.
8. Priestley D, Bittar JH, Ibarbia L, Risco CA, Galvao KN. Effect of feeding maternal colostrum or plasma-derived or colostrum-derived colostrum replacer on passive transfer of immunity, health, and performance of preweaning heifer calves. *J Dairy Sci.* 2013;96: 3247-3256.
9. Berge AC, Besser TE, Moore DA, Sischo WM. Evaluation of the effects of oral colostrum supplementation during the first fourteen days on the health and performance of preweaned calves. *J Dairy Sci.* 2009;92: 286-295.
10. National Animal Health Monitoring System. Transfer of maternal immunity to calves. Washington, DC: National Dairy Heifer Evaluation Project (NDHEP), USDA; 1993.
11. Furman-Fratczak K, Rzasa A, Stefaniak T. The influence of colostral immunoglobulin concentration in heifer calves' serum on their health and growth. *J Dairy Sci.* 2011;94: 5536-5543.
12. Van Donkersgoed J, Ribble CS, Boyer LG, Townsend HG. Epidemiological study of enzootic pneumonia in dairy calves in Saskatchewan. *Can J Vet Res.* 1993;57: 247-254.

13. Virtala AM, Grohn YT, Mechor GD, Erb HN. The effect of maternally derived immunoglobulin G on the risk of respiratory disease in heifers during the first 3 months of life. *Prev Vet Med.* 1999;39: 25-37.
14. Windeyer MC, Leslie KE, Godden SM, Hodgins DC, Lissemore KD, LeBlanc SJ. Factors associated with morbidity, mortality, and growth of dairy heifer calves up to 3 months of age. *Prev Vet Med.* 2014;113: 231-240.
15. Virtala AM, Mechor GD, Grohn YT, Erb HN. Morbidity from nonrespiratory diseases and mortality in dairy heifers during the first three months of life. *J Am Vet Med Assoc.* 1996;208: 2043-2046.
16. Gow S, Waldner C, Ross C. The effect of treatment duration on weaning weights in a cow-calf herd with a protracted severe outbreak of diarrhea in calves. *Can Vet J.* 2005;46: 418-423, 425-416.
