# Supplementary material for: Failure of Passive Immune Transfer in Calves: A Meta-Analysis on the Consequences and Assessment of the Economic Impact
Source: PubMed Central journal article supplement (PMC4795751; doi:10.1371/journal.pone.0150452), 2016-03-17
Supplement: pone.0150452.s005.pdf [file pone.0150452.s005.pdf]

Table S4. Raw data used for the review of ADG reduction in calves without failure of passive transfer

| # of calves | Definition of FPT <sup>1</sup> or of disease |             |                   | ADG decrease in case of FPT or disease |                  |                  |         |                  | Covariates                                           |       | References |
|-------------|----------------------------------------------|-------------|-------------------|----------------------------------------|------------------|------------------|---------|------------------|------------------------------------------------------|-------|------------|
|             | Control (g/l)                                | FPT (g/l)   | Prev <sup>3</sup> | Period                                 | ADG <sup>3</sup> | Value            | P value | U/M <sup>4</sup> | Details                                              | Breed |            |
| 1,511       | IgG ≥ 22                                     | IgG < 22    | 40                | 0-200                                  | 920              | -16              | 0,05    | M                | Birth, sex, calving score                            | D     | [7]        |
| 156         | IgG ≥ 10                                     | IgG < 3.5   | 19                | 0-60                                   | 1050             | -120             | 0,01    | M                | Calving score, birth weight                          | D     | [9]        |
| 221         | IgG ≥ 10                                     | IgG= 3.5-10 | 62                | 0-28                                   | 1050             | -30              | 0,01    | M                | Calving score, birth weight                          | D     | [9]        |
| 410         | IgG ≥ 8                                      | IgG < 8     | na                | 0-30                                   | 394              | -48              | 0,01    | M                | Season, treated pneumonia, age of dam                | D     | [13]       |
| 410         | IgG ≥ 8                                      | IgG < 8     | na                | 0-90                                   | 565              | -30 <sup>6</sup> | 0,01    | M                | Season, treated pneumonia, age of dam                | D     | [13]       |
| 1,000       | IgG ≥ 12                                     | IgG < 12    | 28                | 0-35                                   | 285              | -80              | 0,01    | M                | Season of birth, age of dam                          | D     | [2]        |
| 1,000       | IgG ≥ 12                                     | IgG < 12    | 28                | 35-70                                  | 600              | -160             | 0,01    | M                | Season of birth, age of dam                          | D     | [2]        |
| 1,000       | IgG ≥ 12                                     | IgG < 12    | 28                | 70-105                                 | 628              | -260             | 0,01    | M                | Season of birth, age of dam                          | D     | [2]        |
| 1,000       | IgG ≥ 12                                     | IgG < 12    | 28                | 105-180                                | 800              | -90              | 0,01    | M                | Season of birth, age of dam                          | D     | [2]        |
| 1,000       | IgG ≥ 12                                     | IgG < 12    | 28                | 0-180                                  | 627              | -134             | 0,01    | M                | Season of birth, age of dam                          | D     | [2]        |
| 175         | IgG ≥ 15                                     | IgG < 15    | 5                 | 365-A11                                | 640              | -50              | 0,05    | U                |                                                      | D     | [11]       |
| 323         | TP ≥ 52                                      | TP < 52     | 11                | 0-90                                   | 950 <sup>7</sup> | -8 <sup>7</sup>  | <0,01   | M                | Twin, age, vaccine, season of birth, main diseases   | C     | [14]       |
| 147         | ≥ 1 disease event                            |             | 62                | 0-100                                  | 410              | -89              | 0,001   | U                |                                                      | D     | [8]        |
| 263         | Respiratory                                  |             | 47                | W-242                                  | 860              | -40              | 0,04    | M                | Weaning weight, Sex, Mastitis of dam                 | C     | [6]        |
| 263         | Morbidity                                    |             | 47                | 0-242                                  | 860              | -66              | 0,01    | M                | Birth weight, weaning age, sex, type of birth        | C     | [6]        |
| 410         | Respiratory <sup>8</sup>                     |             | na                | 0-90                                   | 565              | -14 <sup>9</sup> | 0,01    | M                | Season, Body weight, Umbilical infection, Age of dam | C     | [15]       |
| 321         | Diarrhoea <sup>9</sup>                       |             | 90                | 0-200                                  | 931              | -76              | 0,0015  | M                | Sex                                                  | B     | [16]       |
| 207         | Diarrhoeal (trt days)                        |             | 21                | 0-200                                  | 931              | -28              | 0,04    | M                | Sex, age of dam                                      | B     | [16]       |

Na: not available. 1: Failure of passive transfer; 2: These animals are used as reference (no FPT) to calculate the OR. When not specified, they are the opposite of the definition of FPT; 3: Prevalence; 4 U=univariate model; M=multivariate model; 5: D=dairy; B=Beef; C: Crossed or undetermined; 6: Independent to pneumonia diagnosis. 7: Weight from heart-girth meaning tape; 8 Pneumonia duration (weeks) 9: Each week of pneumonia reduced the ADG by 9 g; 9: > 6 trt vs 0-1 trt.

## References

1. Tyler JW, Hancock DD, Thorne JG, Gay CC, Gay JM. Partitioning the mortality risk associated with inadequate passive transfer of colostral immunoglobulins in dairy calves. *J Vet Intern Med.* 1999;13: 335-337.
2. Robison JD, Stott GH, DeNise SK. Effects of passive immunity on growth and survival in the dairy heifer. *J Dairy Sci.* 1988;71: 1283-1287.
3. Rea DE, Tyler JW, Hancock DD, Besser TE, Wilson L, Krytenberg DS, et al. Prediction of calf mortality by use of tests for passive transfer of colostral immunoglobulin. *J Am Vet Med Assoc.* 1996;208: 2047-2049.
4. Donovan GA, Dohoo IR, Montgomery DM, Bennett FL. Associations between passive immunity and morbidity and mortality in dairy heifers in Florida, USA. *Prev Vet Med.* 1998;34: 31-46.
5. Waldner CL, Rosengren LB. Factors associated with serum immunoglobulin levels in beef calves from Alberta and Saskatchewan and association between passive transfer and health outcomes. *Can Vet J.* 2009;50: 275-281.
6. Wittum TE, Perino LJ. Passive immune status at postpartum hour 24 and long-term health and performance of calves. *Am J Vet Res.* 1995;56: 1149-1154.
7. Dewell RD, Hungerford LL, Keen JE, Laegreid WW, Griffin DD, Rupp GP, et al. Association of neonatal serum immunoglobulin G1 concentration with health and performance in beef calves. *J Am Vet Med Assoc.* 2006;228: 914-921.
8. Priestley D, Bittar JH, Ibarbia L, Risco CA, Galvao KN. Effect of feeding maternal colostrum or plasma-derived or colostrum-derived colostrum replacer on passive transfer of immunity, health, and performance of preweaning heifer calves. *J Dairy Sci.* 2013;96: 3247-3256.
9. Berge AC, Besser TE, Moore DA, Sischo WM. Evaluation of the effects of oral colostrum supplementation during the first fourteen days on the health and performance of preweaned calves. *J Dairy Sci.* 2009;92: 286-295.
10. National Animal Health Monitoring System. Transfer of maternal immunity to calves. Washington, DC: National Dairy Heifer Evaluation Project (NDHEP), USDA; 1993.
11. Furman-Fratczak K, Rzasa A, Stefaniak T. The influence of colostral immunoglobulin concentration in heifer calves' serum on their health and growth. *J Dairy Sci.* 2011;94: 5536-5543.
12. Van Donkersgoed J, Ribble CS, Boyer LG, Townsend HG. Epidemiological study of enzootic pneumonia in dairy calves in Saskatchewan. *Can J Vet Res.* 1993;57: 247-254.

13. Virtala AM, Grohn YT, Mechor GD, Erb HN. The effect of maternally derived immunoglobulin G on the risk of respiratory disease in heifers during the first 3 months of life. *Prev Vet Med.* 1999;39: 25-37.
14. Windeyer MC, Leslie KE, Godden SM, Hodgins DC, Lissemore KD, LeBlanc SJ. Factors associated with morbidity, mortality, and growth of dairy heifer calves up to 3 months of age. *Prev Vet Med.* 2014;113: 231-240.
15. Virtala AM, Mechor GD, Grohn YT, Erb HN. Morbidity from nonrespiratory diseases and mortality in dairy heifers during the first three months of life. *J Am Vet Med Assoc.* 1996;208: 2043-2046.
16. Gow S, Waldner C, Ross C. The effect of treatment duration on weaning weights in a cow-calf herd with a protracted severe outbreak of diarrhea in calves. *Can Vet J.* 2005;46: 418-423, 425-416.
